# Supplementary material for: Multi-Variety Transcriptomic Analysis Identifies Oxalate and L-Ascorbate Oxidation as Key Pathways Driving High Oxalate Levels in Sour-Type Star Fruit
Source: Research Square preprint supplement (doi:10.21203/rs.3.rs-7844594/v1), 2025-11-13
Supplement: Supplementary file 1 [file 692d8cb1d1b0eb2832cbb7d9.xlsx]

## Sheet: Sheet1
Name	Sequence (5'→ 3')	Gene
AcGAPDH2-QF1	ATGGAAGCATCACGAACTCAAG	GAPDH
AcGAPDH2-QR1	GAGCAGCAGCCTTATCCTTG
2020060-QF3	ACCATCTGGAAGCCTTCATCA	AcVTC2-II
2020060-QR3	CAGCCTTTCATCTTGGGAGTG
2012859-QF3	TCGTGGCACTGAGATTCTTACC	AcOXO19
2012859-QR3	GCATGGGCGTCTCCAACAT
2012853-QF1	GCTTTCAGTAGCCAAAACCCT	AcOXO13
2012853-QR1	TGACCTCATCCTCGCTCATCT
2005091-QF2	TCTTTGGGATCATTGGTGACTG	AcOXO14
2005091-QR2	CGAAAACAACCTCTGTGGCTC
2001380-QF2	GCTTTCCTCATGGGCTACTTC	AcGLO1
2001380-QR2	ATGTCAGCTTCCCTGCGAC
2007411-QF1	ATGCCCAAAAGTTCCATTCC	AcPGP1
2007411-QR1	ACCACCCAGACCTGTATAGCC
2000883-QF1	TCCAAATGCCCCAATAGATG	AcVTC2-I
2000883-QR1	CCAAACTGTTATAGCCCAACCTG
