# Supplementary material for: Multi-Variety Transcriptomic Analysis Identifies Oxalate and L-Ascorbate Oxidation as Key Pathways Driving High Oxalate Levels in Sour-Type Star Fruit
Source: Research Square preprint supplement (doi:10.21203/rs.3.rs-7844594/v1), 2025-11-13
Supplement: Supplementary file 2 [file 90c73ab3d64622e53955c9c5.xlsx]

## Sheet: Sheet1
sample	variety	stage	tissue	average_FW_oxalate (mg/100 g)	range(±)	BeforeQC_reads	BeforeQC_bases	BeforeQC_Q20_bases	BeforeQC_Q20_rate	BeforeQC_Q30_bases	BeforeQC_Q30_rate	BeforeQC_GC_content	AfterQC_reads	AfterQC_bases	AfterQC_Q20_bases	AfterQC_Q20_rate	AfterQC_Q30_bases	AfterQC_Q30_rate	AfterQC_GC_content	Low_quality_reads	Too_many_N_reads	Too_short_reads	Too_long_reads	Adapter_trimmed_reads	Adapter_trimmed_bases	Duplication
A1	Y7	YR	pulp	1092	211.9	47254056	7088108400	7063379987	0.996511	6973367773	0.983812	0.442718	47253574	7061998314	7037402264	0.996517	6947766277	0.996517	0.442514	0	12	470	0	950324	26045984	0.148614
A2	Y7	YR	pulp	1092	211.9	51745850	7761877500	7716462807	0.994149	7594216906	0.978399	0.443083	51745746	7729854828	7684713454	0.99416	7563044146	0.99416	0.442848	0	16	88	0	1150782	32008573	0.171791
A3	Y7	YR	pulp	1092	211.9	48898394	7334759100	7310107732	0.996639	7220111945	0.984369	0.441723	48897834	7312788104	7288265507	0.996647	7198635555	0.996647	0.441569	0	22	538	0	797472	21896058	0.200149
B1	Y20	YR	pulp	204.5	41.7	45139076	6770861400	6747797730	0.996594	6663438462	0.984135	0.44298	45139066	6752886396	6729926364	0.9966	6645862427	0.9966	0.442853	0	10	0	0	560936	17973504	0.215451
B2	Y20	YR	pulp	204.5	41.7	47112974	7066946100	7042220118	0.996501	6951591359	0.983677	0.442788	47112914	7046847650	7022243041	0.996508	6931955515	0.996508	0.442648	0	8	52	0	663953	20090385	0.217133
B3	Y20	YR	pulp	204.5	41.7	43659346	6548901900	6526435521	0.996569	6444260240	0.984021	0.443738	43659338	6530251474	6507890531	0.996576	6426017508	0.996576	0.443598	0	8	0	0	569036	18649226	0.209795
C1	Y6	YR	pulp	1752	337	63112404	9466860600	9434660703	0.996599	9315455532	0.984007	0.440297	63111524	9443967720	9411878513	0.996602	9292996950	0.996602	0.440194	0	14	866	0	753247	22774609	0.368326
C2	Y6	YR	pulp	1752	337	46275470	6941320500	6916073535	0.996363	6823596886	0.98304	0.441113	46274738	6923110670	6897961929	0.996367	6805771643	0.996367	0.440992	0	14	718	0	638801	18111690	0.269069
C3	Y6	YR	pulp	1752	337	47303174	7095476100	7070374333	0.996462	6977237114	0.983336	0.439702	47302304	7074714002	7049704646	0.996465	6956839806	0.996465	0.439563	0	10	860	0	691015	20646028	0.337852
D1	Y5	YR	pulp	162.2	43.2	44969250	6745387500	6720008577	0.996238	6626404680	0.982361	0.442526	44969242	6725925946	6700677773	0.996246	6607443911	0.996246	0.44237	2	6	0	0	589732	19460644	0.235918
D2	Y5	YR	pulp	162.2	43.2	51154142	7673121300	7645310203	0.996376	7543340424	0.983086	0.443731	51154130	7648581978	7620920876	0.996383	7519378941	0.996383	0.443562	0	12	0	0	754686	24537522	0.311473
D3	Y5	YR	pulp	162.2	43.2	49641660	7446249000	7419963430	0.99647	7323853261	0.983563	0.443476	49641638	7419464550	7393342953	0.996479	7297696428	0.996479	0.443277	0	22	0	0	845676	26781150	0.205041
E1	Y22	YR	pulp	189.7	47.7	53609902	8041485300	8012728556	0.996424	7907204301	0.983301	0.448457	53609736	7991661838	7963152889	0.996433	7858334663	0.996433	0.4481	2	14	150	0	1852824	49801512	0.0941199
E2	Y22	YR	pulp	189.7	47.7	44853606	6728040900	6706049161	0.996731	6626471054	0.984904	0.443886	44853006	6698731954	6676894551	0.99674	6597742989	0.99674	0.44364	0	6	594	0	1076099	29228410	0.17522
E3	Y22	YR	pulp	189.7	47.7	47560946	7134141900	7109936126	0.996607	7020996666	0.98414	0.443501	47560886	7113993722	7089906615	0.996614	7001301460	0.996614	0.443361	0	14	46	0	683935	20139909	0.188958
F1	Y23	YR	pulp	671.1	107	58354506	8753175900	8708560642	0.994903	8597942612	0.982265	0.439905	58340218	8732494367	8688193118	0.994927	8577907352	0.994927	0.439792	0	13480	808	0	633047	18553429	0.47658
F2	Y23	YR	pulp	671.1	107	64382564	9657384600	9627850506	0.996942	9520595257	0.985836	0.444993	64381804	9632620520	9603195835	0.996945	9496255893	0.996945	0.444846	0	6	754	0	842525	24662837	0.240013
F3	Y23	YR	pulp	671.1	107	47489464	7123419600	7098717441	0.996532	7008229579	0.983829	0.441317	47488938	7106956612	7082351600	0.996538	6992137318	0.996538	0.441222	0	6	520	0	556047	16392460	0.281034
H1	Y11	YR	pulp	229.2	38.3	48476742	7271511300	7244216461	0.996246	7144379629	0.982516	0.443044	48476680	7249446961	7222293393	0.996254	7122855378	0.996254	0.442889	0	14	48	0	724132	22055798	0.319575
H2	Y11	YR	pulp	229.2	39.3	53648120	8047218000	8020595415	0.996692	7921601187	0.98439	0.444041	53647384	8024491196	7997998967	0.996699	7899379241	0.996699	0.443906	0	16	720	0	775726	22627976	0.330154
H3	Y11	YR	pulp	229.2	38.3	52232586	7834887900	7807573144	0.996514	7707894807	0.983791	0.443034	52231944	7811907391	7784719688	0.99652	7685404150	0.99652	0.442892	0	12	630	0	772621	22894416	0.241078
I1	Y8	YR	pulp	217.9	32.6	56010196	8401529400	8375014760	0.996844	8278322364	0.985335	0.441692	56009300	8377028559	8350636777	0.99685	8254296513	0.99685	0.441523	0	16	880	0	780344	24382139	0.188577
I2	Y8	YR	pulp	217.9	32.6	47400602	7110090300	7084403712	0.996387	6990458359	0.983174	0.443077	47400594	7086764896	7061229221	0.996397	6967711473	0.996397	0.442899	0	8	0	0	706444	23324204	0.268577
I3	Y8	YR	pulp	217.9	32.6	45564448	6834667200	6811135920	0.996557	6724922931	0.983943	0.443904	45563988	6809906344	6786495544	0.996562	6700626951	0.996562	0.443705	0	10	450	0	904885	24699494	0.157016
J1	Y3	YR	pulp	196.7	57	45706230	6855934500	6831911725	0.996496	6744151006	0.983695	0.442267	45705574	6831974731	6808078234	0.996502	6720678026	0.996502	0.442085	0	8	648	0	849373	23871884	0.175999
J2	Y3	YR	pulp	196.7	57	47116538	7067480700	7043126748	0.996554	6955100759	0.984099	0.442608	47115982	7036474593	7012268188	0.99656	6924650842	0.99656	0.44234	0	14	542	0	1206779	30931892	0.14282
J3	Y3	YR	pulp	196.7	57	50940840	7641126000	7614596580	0.996528	7518472290	0.983948	0.442379	50940452	7617803565	7591398878	0.996534	7495623678	0.996534	0.442224	0	16	372	0	879044	23270906	0.165995
Y24_1	Y24	YR	pulp	174.2	60	41287372	6193105800	6087161733	0.982893	5914802727	0.955062	0.448208	40941256	6073470471	5998435455	0.987645	5850270180	0.987645	0.446773	342332	3192	592	0	1886405	67886134	0.18806
Y24_2	Y24	YR	pulp	174.2	60	41135334	6170300100	6058516239	0.981884	5883518222	0.953522	0.450132	40778646	6048942424	5972273501	0.987325	5823855540	0.987325	0.448564	353586	3102	0	0	1686388	67951708	0.188449
Y24_3	Y24	YR	pulp	174.2	60	41435218	6215282700	6100849815	0.981588	5925237046	0.953333	0.450251	41060774	6079674352	6002797662	0.987355	5855740465	0.987355	0.448595	371204	3240	0	0	2074230	79550104	0.200223

## Sheet: Sheet2
1	F1-24	C1-24	F2-24	C2-24	F3-24	C3-24	F4-24	C4-24	F5-24	C5-24
BeforeQC_reads	41332858	39886072	41287372	43388486	40237274	40180402	41135334	43229424	41435218	44347456
BeforeQC_bases	6199928700	5982910800	6193105800	6508272900	6035591100	6027060300	6170300100	6484413600	6215282700	6652118400
BeforeQC_Q20_bases	6096131199	5892370547	6087161733	6396664609	5926819896	5935885833	6058516239	6383931625	6100849815	6554629256
BeforeQC_Q20_rate	0.983258	0.984867	0.982893	0.982851	0.981978	0.984872	0.981884	0.984504	0.981588	0.985345
BeforeQC_Q30_bases	5927642317	5740476359	5914802727	6211414524	5756647587	5779904437	5883518222	6214308315	5925237046	6389627590
BeforeQC_Q30_rate	0.956082	0.959479	0.955062	0.954388	0.953784	0.958992	0.953522	0.958345	0.953333	0.96054
BeforeQC_GC_content	0.447023	0.444623	0.448208	0.44779	0.45125	0.443575	0.450132	0.443952	0.450251	0.444402
AfterQC_reads	40983584	39583732	40941256	43031872	39884804	39870724	40778646	42878294	41060774	44030812
AfterQC_bases	6084936360	5872900826	6073470471	6379950529	5904632294	5903067966	6048942424	6371150461	6079674352	6534036300
AfterQC_Q20_bases	6011922997	5808176709	5998435455	6300129314	5830463864	5837242957	5972273501	6299069220	6002797662	6464165197
AfterQC_Q20_rate	0.988001	0.988979	0.987645	0.987489	0.987439	0.988849	0.987325	0.988686	0.987355	0.989307
AfterQC_Q30_bases	5867715999	5676890523	5850270180	6140592717	5687201092	5702464915	5823855540	6151983284	5855740465	6321301892
AfterQC_Q30_rate	0.988001	0.988979	0.987645	0.987489	0.987439	0.988849	0.987325	0.988686	0.987355	0.989307
AfterQC_GC_content	0.445612	0.443294	0.446773	0.446191	0.44963	0.441964	0.448564	0.44274	0.448595	0.44307
Low_quality_reads	346130	298638	342332	352830	349406	305740	353586	347286	371204	312740
Too_many_N_reads	3144	3254	3192	3202	3064	3362	3102	3288	3240	3364
Too_short_reads	0	448	592	582	0	576	0	556	0	540
Too_long_reads	0	0	0	0	0	0	0	0	0	0
Adapter_trimmed_reads	1618542	1985450	1886405	2136440	2108036	2485881	1686388	1870290	2074230	2130809
Adapter_trimmed_bases	62685314	64812963	67886134	75016840	78198958	77724005	67951708	60746483	79550104	70744236
Duplication	0.211692	0.181477	0.18806	0.176373	0.178153	0.166322	0.188449	0.190735	0.200223	0.183953
