# Supplementary material for: Multi-Variety Transcriptomic Analysis Identifies Oxalate and L-Ascorbate Oxidation as Key Pathways Driving High Oxalate Levels in Sour-Type Star Fruit
Source: Research Square preprint supplement (doi:10.21203/rs.3.rs-7844594/v1), 2025-11-13
Supplement: Supplementary file 3 [file 91610b1e591b6922d342110a.xlsx]

## Sheet: Sheet 1
GeneID	TPM_mean	name	Family	pathway	NR:Seq-id	NR:Score	NR:Evalue	NR:Description	NT:Seq-id	NT:Score	NT:Evalue	NT:Description	Uniprot:UniProtKB-AC	Uniprot:Score	Uniprot:Evalue	Uniprot:Description	COG:gene	COG:Score	COG:Eval	COG:num	Pfam:pfam_ID	Pfam:pfam_Name	Pfam:pfam_Description	GO:biological_process	GO:cellular_component	GO:molecular_function	KEGG:KO	KEGG:Description
geneYangtao2023076	11.538	AcOXO21	oxalate oxidase（Germin_like_21）	oxalate oxidation	gi|703070468|ref|XP_010088793.1|	704	5e-91	Germin-like protein subfamily 3 member 2 [Morus notabilis]	gi|566181877|ref|XM_002310978.2|	105	2e-46	Populus trichocarpa Germin-like protein subfamily 3 member 2 precursor (POPTR_0008s02170g) mRNA, complete cds	Q9SR72	208	7e-66	Germin-like protein subfamily 3 member 2	.	.	.	.	pfam00190	Cupin_1	Cupin. This family represents the conserved barrel domain of the 'cupin' superfamily ('cupa' is the Latin term for a small barrel). This family contains 11S and 7S plant seed storage proteins, and germins. Plant seed storage proteins provide the major nitrogen source for the developing plant.	GO:0033609|oxalate metabolic process;	GO:0048046|apoplast;GO:0005618|cell wall;	GO:0030145|manganese ion binding;GO:0045735|nutrient reservoir activity;GO:0046564|oxalate decarboxylase activity;	.	.
geneYangtao2001380	94.0074	AcGLO1	glycolate/glyoxylate oxidase Like_1	glycolate oxidation	gi|590611713|ref|XP_007022181.1|	1789	0	Aldolase-type TIM barrel family protein isoform 1 [Theobroma cacao]	gi|595862762|ref|XM_007211399.1|	642	0	Prunus persica hypothetical protein (PRUPE_ppa007390mg) mRNA, complete cds	Q9LRR9	674	0	Peroxisomal (S)-2-hydroxy-acid oxidase GLO1	all0170	332	1.33e-111	COG1304	pfam01070	FMN_dh	FMN-dependent dehydrogenase.	GO:0042742|defense response to bacterium;GO:0050665|hydrogen peroxide biosynthetic process;GO:0009854|oxidative photosynthetic carbon pathway;GO:0009735|response to cytokinin;	GO:0048046|apoplast;GO:0009507|chloroplast;GO:0009570|chloroplast stroma;GO:0022626|cytosolic ribosome;GO:0016020|membrane;GO:0005634|nucleus;GO:0005777|peroxisome;GO:0009506|plasmodesma;	GO:0010181|FMN binding;GO:0008891|glycolate oxidase activity;GO:0052853|long-chain-(S)-2-hydroxy-long-chain-acid oxidase activity;GO:0052854|medium-chain-(S)-2-hydroxy-acid oxidase activity;GO:0052852|very-long-chain-(S)-2-hydroxy-acid oxidase activity;	K11517	HAO; (S)-2-hydroxy-acid oxidase [EC:1.1.3.15]
geneYangtao2008043	19.1511	AcMDH1	Malate dehydrogenase Like_1	Isocitrate cleavage	gi|359475502|ref|XP_003631692.1|	1765	0	PREDICTED: malate dehydrogenase, glyoxysomal [Vitis vinifera]	gi|802611525|ref|XM_012219149.1|	592	0	PREDICTED: Jatropha curcas malate dehydrogenase, glyoxysomal (LOC105635993), mRNA	P19446	645	0	Malate dehydrogenase, glyoxysomal	STM3359	327	8.29e-111	COG0039	pfam02866	Ldh_1_C	lactate/malate dehydrogenase, alpha/beta C-terminal domain. L-lactate dehydrogenases are metabolic enzymes which catalyse the conversion of L-lactate to pyruvate, the last step in anaerobic glycolysis. L-2-hydroxyisocaproate dehydrogenases are also members of the family. Malate dehydrogenases catalyse the interconversion of malate to oxaloacetate. The enzyme participates in the citric acid cycle.…	GO:0006097|glyoxylate cycle;GO:0006108|malate metabolic process;GO:0006099|tricarboxylic acid cycle;	GO:0009514|glyoxysome;	GO:0030060|L-malate dehydrogenase activity;	.	.
geneYangtao2019950	11.4262	AcGLO4	glycolate/glyoxylate oxidase Like_4	glycolate oxidation	gi|590622434|ref|XP_007025049.1|	1744	0	Aldolase-type TIM barrel family protein isoform 1 [Theobroma cacao]	gi|590622439|ref|XM_007024989.1|	579	0	Theobroma cacao Aldolase-type TIM barrel family protein isoform 1 (TCM_029459) mRNA, complete cds	Q9LRR9	645	0	Peroxisomal (S)-2-hydroxy-acid oxidase GLO1	all0170	323	3.53e-108	COG1304	pfam01070	FMN_dh	FMN-dependent dehydrogenase.	GO:0042742|defense response to bacterium;GO:0050665|hydrogen peroxide biosynthetic process;GO:0009854|oxidative photosynthetic carbon pathway;GO:0009735|response to cytokinin;	GO:0048046|apoplast;GO:0009507|chloroplast;GO:0009570|chloroplast stroma;GO:0022626|cytosolic ribosome;GO:0016020|membrane;GO:0005634|nucleus;GO:0005777|peroxisome;GO:0009506|plasmodesma;	GO:0010181|FMN binding;GO:0008891|glycolate oxidase activity;GO:0052853|long-chain-(S)-2-hydroxy-long-chain-acid oxidase activity;GO:0052854|medium-chain-(S)-2-hydroxy-acid oxidase activity;GO:0052852|very-long-chain-(S)-2-hydroxy-acid oxidase activity;	K11517	HAO; (S)-2-hydroxy-acid oxidase [EC:1.1.3.15]
geneYangtao2020060	47.9619	AcVTC2-II	GDP_L_galactose phosphorylase（VTC2）Like_2	L-ascorbate oxidation	gi|731405370|ref|XP_010655755.1|	1044	3e-137	PREDICTED: GDP-L-galactose phosphorylase 1-like isoform X1 [Vitis vinifera]	gi|567913144|ref|XM_006448823.1|	171	9e-83	Citrus clementina hypothetical protein (CICLE_v10017717mg) mRNA, complete cds	Q8RWE8	174	3e-48	GDP-L-galactose phosphorylase 1	.	.	.	.	pfam07217	Het-C	Heterokaryon incompatibility protein Het-C. In filamentous fungi, het loci (for heterokaryon incompatibility) are believed to regulate self/nonself-recognition during vegetative growth. As filamentous fungi grow, hyphal fusion occurs within an individual colony to form a network. Hyphal fusion can occur also between different individuals to form a heterokaryon, in which genetically distinct nucle…	GO:0052544|defense response by callose deposition in cell wall;GO:0042742|defense response to bacterium;GO:0006006|glucose metabolic process;GO:0019853|L-ascorbic acid biosynthetic process;GO:0009408|response to heat;GO:0009753|response to jasmonic acid;	GO:0005737|cytoplasm;GO:0005634|nucleus;	GO:0010475|galactose-1-phosphate guanylyltransferase (GDP) activity;GO:0080048|GDP-D-glucose phosphorylase activity;GO:0010472|GDP-galactose:glucose-1-phosphate guanylyltransferase activity;GO:0010471|GDP-galactose:mannose-1-phosphate guanylyltransferase activity;GO:0010473|GDP-galactose:myoinositol-1-phosphate guanylyltransferase activity;GO:0080047|GDP-L-galactose phosphorylase activity;GO:0010…	K14190	VTC2_5; GDP-L-galactose phosphorylase [EC:2.7.7.69]
geneYangtao2005297	212.112	AcACO2	Aconitase Like_2	Isocitrate cleavage	gi|641835683|gb|KDO54656.1|	3992	0	hypothetical protein CISIN_1g001917mg [Citrus sinensis]	gi|566197058|ref|XM_006376717.1|	807	0	Populus trichocarpa aconitate hydratase family protein (POPTR_0012s06320g) mRNA, complete cds	Q9SIB9	1487	0	Aconitate hydratase 2, mitochondrial	STM1712	873	0	COG1048	pfam00330	Aconitase	Aconitase family (aconitate hydratase).	GO:0006101|citrate metabolic process;GO:0006097|glyoxylate cycle;GO:0006102|isocitrate metabolic process;GO:0009737|response to abscisic acid;GO:0046686|response to cadmium ion;GO:0006979|response to oxidative stress;GO:0009651|response to salt stress;GO:0006099|tricarboxylic acid cycle;	GO:0005618|cell wall;GO:0009507|chloroplast;GO:0009570|chloroplast stroma;GO:0005829|cytosol;GO:0005739|mitochondrion;GO:0005774|vacuolar membrane;	GO:0051539|4 iron, 4 sulfur cluster binding;GO:0003994|aconitate hydratase activity;GO:0005524|ATP binding;GO:0005507|copper ion binding;	K01681	ACO, acnA; aconitate hydratase [EC:4.2.1.3]
geneYangtao2007479	316.831	AcVTC4	L_Galactose_1P phosphatase	L-ascorbate oxidation	gi|255581603|ref|XP_002531606.1|	1288	2e-177	PREDICTED: inositol-phosphate phosphatase [Ricinus communis]	gi|985433577|ref|XM_006467260.2|	447	0	PREDICTED: Citrus sinensis inositol-phosphate phosphatase (LOC102624075), transcript variant X1, mRNA	P54928	455	5e-161	Inositol monophosphatase 3	sll1383	184	2.57e-56	COG0483	pfam00459	Inositol_P	Inositol monophosphatase family.	GO:0006021|inositol biosynthetic process;GO:0046855|inositol phosphate dephosphorylation;GO:0046854|phosphatidylinositol phosphorylation;GO:0007165|signal transduction;	GO:0005737|cytoplasm;	GO:0008934|inositol monophosphate 1-phosphatase activity;GO:0052832|inositol monophosphate 3-phosphatase activity;GO:0052833|inositol monophosphate 4-phosphatase activity;GO:0052834|inositol monophosphate phosphatase activity;GO:0000287|magnesium ion binding;	K10047	VTC4; inositol-phosphate phosphatase / L-galactose 1-phosphate phosphatase [EC:3.1.3.25 3.1.3.93]
geneYangtao2005091	59.8493	AcOXO4	oxalate oxidase（Germin_like_4）	oxalate oxidation	gi|848926730|ref|XP_012859082.1|	846	4e-112	PREDICTED: germin-like protein 5-1 [Erythranthe guttata]	gi|1000980558|ref|XM_002512548.2|	161	2e-77	PREDICTED: Ricinus communis germin-like protein 5-1 (LOC8274976), mRNA	Q6I544	291	3e-98	Germin-like protein 5-1	sll1358	47.8	7.85e-6	COG2140	pfam00190	Cupin_1	Cupin. This family represents the conserved barrel domain of the 'cupin' superfamily ('cupa' is the Latin term for a small barrel). This family contains 11S and 7S plant seed storage proteins, and germins. Plant seed storage proteins provide the major nitrogen source for the developing plant.	GO:0033609|oxalate metabolic process;GO:0010497|plasmodesmata-mediated intercellular transport;GO:2000280|regulation of root development;	GO:0048046|apoplast;GO:0005618|cell wall;GO:0009506|plasmodesma;	GO:0030145|manganese ion binding;GO:0045735|nutrient reservoir activity;GO:0046564|oxalate decarboxylase activity;	.	.
geneYangtao2017037	129.892	AcAAE3-II	oxalyl_CoA synthase II	oxalate decarboxylation	gi|802740718|ref|XP_012086931.1|	2163	0	PREDICTED: oxalate--CoA ligase-like [Jatropha curcas]	gi|802740717|ref|XM_012231541.1|	405	0	PREDICTED: Jatropha curcas oxalate--CoA ligase-like (LOC105645829), mRNA	Q9SMT7	722	0	Oxalate--CoA ligase	SPCC1827.03c	427	2.42e-144	COG0318	pfam00501	AMP-binding	AMP-binding enzyme.	GO:0050832|defense response to fungus;GO:0033611|oxalate catabolic process;GO:0010030|positive regulation of seed germination;GO:0046686|response to cadmium ion;GO:0009735|response to cytokinin;GO:0010214|seed coat development;	GO:0048046|apoplast;GO:0009507|chloroplast;GO:0009570|chloroplast stroma;GO:0005737|cytoplasm;GO:0009506|plasmodesma;	GO:0005524|ATP binding;GO:0050203|oxalate-CoA ligase activity;	.	.
geneYangtao2007411	34.6616	AcPGP1	phosphoglycolate phosphatase	glycolate oxidation	gi|568825693|ref|XP_006467212.1|	1378	0	PREDICTED: phosphoglycolate phosphatase 2 [Citrus sinensis]	gi|1000937447|ref|XM_002534293.2|	405	0	PREDICTED: Ricinus communis phosphoglycolate phosphatase 2 (LOC8262021), mRNA	Q8GWU0	500	1e-177	Phosphoglycolate phosphatase 2	SPBC15D4.15	194	6.08e-60	COG0647	pfam13344	Hydrolase_6	Haloacid dehalogenase-like hydrolase. This family is part of the HAD superfamily.	GO:0016311|dephosphorylation;	GO:0009507|chloroplast;GO:0005829|cytosol;	GO:0016791|phosphatase activity;GO:0008967|phosphoglycolate phosphatase activity;GO:0004674|protein serine/threonine kinase activity;	K19269	PGP, PGLP; phosphoglycolate phosphatase [EC:3.1.3.18 3.1.3.48]
geneYangtao2022654	104.63	AcCS1	Citrate synthase	Isocitrate cleavage	gi|703066983|ref|XP_010087849.1|	2378	0	Citrate synthase [Morus notabilis]	gi|802716397|ref|XM_012229598.1|	760	0	PREDICTED: Jatropha curcas citrate synthase, glyoxysomal (LOC105644297), mRNA	P49299	886	0	Citrate synthase, glyoxysomal	BMEI0836	400	3.86e-135	COG0372	pfam00285	Citrate_synt	Citrate synthase.	GO:0006097|glyoxylate cycle;GO:0006099|tricarboxylic acid cycle;	GO:0009514|glyoxysome;	GO:0046912|transferase activity, transferring acyl groups, acyl groups converted into alkyl on transfer;	.	.
geneYangtao2006727	734.567	AcOXC	oxalyl_CoA decarboxylase	oxalate decarboxylation	gi|802634514|ref|XP_012078036.1|	2362	0	PREDICTED: 2-hydroxyacyl-CoA lyase [Jatropha curcas]	gi|743876210|ref|XM_011036832.1|	390	0	PREDICTED: Populus euphratica 2-hydroxyacyl-CoA lyase (LOC105133039), mRNA	Q9LF46	868	0	2-hydroxyacyl-CoA lyase	yfdU	424	1.59e-142	COG0028	pfam02776	TPP_enzyme_N	Thiamine pyrophosphate enzyme, N-terminal TPP binding domain.	.	GO:0005829|cytosol;	GO:0016831|carboxy-lyase activity;GO:0000287|magnesium ion binding;GO:0030976|thiamine pyrophosphate binding;	K12261	HACL1; 2-hydroxyacyl-CoA lyase 1 [EC:4.1.-.-]
geneYangtao2012299	7.08199	AcAAE3-I	oxalyl_CoA synthase I	oxalate decarboxylation	gi|747059551|ref|XP_011076162.1|	2145	0	PREDICTED: oxalate--CoA ligase [Sesamum indicum]	gi|590672761|ref|XM_007038640.1|	498	0	Theobroma cacao AMP-dependent synthetase and ligase family protein (TCM_015177) mRNA, complete cds	Q9SMT7	762	0	Oxalate--CoA ligase	SPCC1827.03c	405	4.09e-136	COG0318	pfam00501	AMP-binding	AMP-binding enzyme.	GO:0050832|defense response to fungus;GO:0033611|oxalate catabolic process;GO:0010030|positive regulation of seed germination;GO:0046686|response to cadmium ion;GO:0009735|response to cytokinin;GO:0010214|seed coat development;	GO:0048046|apoplast;GO:0009507|chloroplast;GO:0009570|chloroplast stroma;GO:0005737|cytoplasm;GO:0009506|plasmodesma;	GO:0005524|ATP binding;GO:0050203|oxalate-CoA ligase activity;	.	.
geneYangtao2014372	1162.48	AcVTC1-II	Mannose_1_phosphate guanyltransferase（VTC1/GMP）Like_2	L-ascorbate oxidation	gi|224038262|gb|ACN38266.1|	1736	0	GDP-D-mannose pyrophosphorylase [Actinidia latifolia]	gi|590562895|ref|XM_007009152.1|	688	0	Theobroma cacao Glucose-1-phosphate adenylyltransferase family protein isoform 1 (TCM_042692) mRNA, complete cds	O22287	654	0	Mannose-1-phosphate guanylyltransferase 1	SPCC1906.01	436	1.09e-152	COG1208	pfam00483	NTP_transferase	Nucleotidyl transferase. This family includes a wide range of enzymes which transfer nucleotides onto phosphosugars.	GO:0030244|cellulose biosynthetic process;GO:0042742|defense response to bacterium;GO:0009298|GDP-mannose biosynthetic process;GO:0019853|L-ascorbic acid biosynthetic process;GO:0060359|response to ammonium ion;GO:0009408|response to heat;GO:0009753|response to jasmonic acid;GO:0010193|response to ozone;GO:0009651|response to salt stress;	GO:0005829|cytosol;GO:0005634|nucleus;	GO:0005525|GTP binding;GO:0004475|mannose-1-phosphate guanylyltransferase activity;	K00966	GMPP; mannose-1-phosphate guanylyltransferase [EC:2.7.7.13]
geneYangtao2012859	505.642	AcOXO19	oxalate oxidase（Germin_like_19）	oxalate oxidation	gi|590641605|ref|XP_007030278.1|	421	2e-59	Germin-like protein subfamily 1 member 18 [Theobroma cacao]	.	.	.	.	Q9FIC8	145	2e-52	Germin-like protein subfamily 1 member 16	.	.	.	.	pfam00190	Cupin_1	Cupin. This family represents the conserved barrel domain of the 'cupin' superfamily ('cupa' is the Latin term for a small barrel). This family contains 11S and 7S plant seed storage proteins, and germins. Plant seed storage proteins provide the major nitrogen source for the developing plant.	GO:0033609|oxalate metabolic process;	GO:0048046|apoplast;GO:0005618|cell wall;	GO:0030145|manganese ion binding;GO:0045735|nutrient reservoir activity;GO:0046564|oxalate decarboxylase activity;	.	.
geneYangtao2000883	3263.14	AcVTC2-I	GDP_L_galactose phosphorylase（VTC2）Like_1	L-ascorbate oxidation	gi|645241230|ref|XP_008226982.1|	1899	0	PREDICTED: GDP-L-galactose phosphorylase 1 [Prunus mume]	gi|590606414|ref|XM_007020668.1|	628	0	Theobroma cacao Galactose-1-phosphate guanylyltransferases,GDP-D-glucose phosphorylases,quercetin 4\'-O-glucosyltransferases (TCM_030818) mRNA, complete cds	Q8RWE8	635	0	GDP-L-galactose phosphorylase 1	.	.	.	.	pfam14266	DUF4356	Domain of unknown function (DUF4356). This family of proteins is found in bacteria. Proteins in this family are approximately 540 amino acids in length.	GO:0052544|defense response by callose deposition in cell wall;GO:0042742|defense response to bacterium;GO:0006006|glucose metabolic process;GO:0019853|L-ascorbic acid biosynthetic process;GO:0009408|response to heat;GO:0009753|response to jasmonic acid;	GO:0005737|cytoplasm;GO:0005634|nucleus;	GO:0010475|galactose-1-phosphate guanylyltransferase (GDP) activity;GO:0080048|GDP-D-glucose phosphorylase activity;GO:0010472|GDP-galactose:glucose-1-phosphate guanylyltransferase activity;GO:0010471|GDP-galactose:mannose-1-phosphate guanylyltransferase activity;GO:0010473|GDP-galactose:myoinositol-1-phosphate guanylyltransferase activity;GO:0080047|GDP-L-galactose phosphorylase activity;GO:0010…	K14190	VTC2_5; GDP-L-galactose phosphorylase [EC:2.7.7.69]
geneYangtao2011117	4.91759	AcOXO6	oxalate oxidase（Germin_like_6）	oxalate oxidation	gi|224068291|ref|XP_002302696.1|	928	2e-124	GERMIN-LIKE protein 10 [Populus trichocarpa]	gi|590720445|ref|XM_007051273.1|	181	1e-88	Theobroma cacao Germin-like protein 16 (TCM_004977) mRNA, complete cds	Q9M263	316	7e-108	Germin-like protein subfamily 2 member 4	sll1358	57.4	4.74e-9	COG2140	pfam00190	Cupin_1	Cupin. This family represents the conserved barrel domain of the 'cupin' superfamily ('cupa' is the Latin term for a small barrel). This family contains 11S and 7S plant seed storage proteins, and germins. Plant seed storage proteins provide the major nitrogen source for the developing plant.	GO:0033609|oxalate metabolic process;GO:0010497|plasmodesmata-mediated intercellular transport;GO:2000280|regulation of root development;	GO:0048046|apoplast;GO:0005618|cell wall;GO:0009505|plant-type cell wall;GO:0009506|plasmodesma;	GO:0030145|manganese ion binding;GO:0045735|nutrient reservoir activity;GO:0046564|oxalate decarboxylase activity;	.	.
geneYangtao2012853	64.939	AcOXO13	oxalate oxidase（Germin_like_13）	oxalate oxidation	gi|731422598|ref|XP_002276315.2|	652	2e-82	PREDICTED: putative germin-like protein 2-1 [Vitis vinifera]	.	.	.	.	Q9FIC8	225	8e-72	Germin-like protein subfamily 1 member 16	.	.	.	.	pfam00190	Cupin_1	Cupin. This family represents the conserved barrel domain of the 'cupin' superfamily ('cupa' is the Latin term for a small barrel). This family contains 11S and 7S plant seed storage proteins, and germins. Plant seed storage proteins provide the major nitrogen source for the developing plant.	GO:0033609|oxalate metabolic process;	GO:0048046|apoplast;GO:0005618|cell wall;	GO:0030145|manganese ion binding;GO:0045735|nutrient reservoir activity;GO:0046564|oxalate decarboxylase activity;	.	.
geneYangtao2006544	68.2379	AcGLO2	glycolate/glyoxylate oxidase Like_2	glycolate oxidation	gi|147789144|emb|CAN60339.1|	1357	0	hypothetical protein VITISV_031318 [Vitis vinifera]	gi|590621067|ref|XM_007024638.1|	250	1e-126	Theobroma cacao Aldolase-type TIM barrel family protein (TCM_046841) mRNA, complete cds	Q9LJH5	379	4e-127	Peroxisomal (S)-2-hydroxy-acid oxidase GLO4	all0170	223	2.69e-68	COG1304	pfam01070	FMN_dh	FMN-dependent dehydrogenase.	GO:0042742|defense response to bacterium;GO:0050665|hydrogen peroxide biosynthetic process;GO:0009854|oxidative photosynthetic carbon pathway;	GO:0005777|peroxisome;	GO:0010181|FMN binding;GO:0052853|long-chain-(S)-2-hydroxy-long-chain-acid oxidase activity;GO:0052854|medium-chain-(S)-2-hydroxy-acid oxidase activity;GO:0052852|very-long-chain-(S)-2-hydroxy-acid oxidase activity;	K11517	HAO; (S)-2-hydroxy-acid oxidase [EC:1.1.3.15]
geneYangtao2010773	207.757	AcPMM	Phosphomannomutase	L-ascorbate oxidation	gi|225454105|ref|XP_002267677.1|	1214	5e-167	PREDICTED: phosphomannomutase [Vitis vinifera]	gi|590722364|ref|XM_007051812.1|	461	0	Theobroma cacao Phosphomannomutase (TCM_005381) mRNA, complete cds	Q1W376	451	4e-160	Phosphomannomutase	SPAC1556.07	313	7.3e-108	COG0561	pfam03332	PMM	Eukaryotic phosphomannomutase. This enzyme EC:5.4.2.8 is involved in the synthesis of the GDP-mannose and dolichol-phosphate-mannose required for a number of critical mannosyl transfer reactions.	GO:0009298|GDP-mannose biosynthetic process;	GO:0005737|cytoplasm;	GO:0004615|phosphomannomutase activity;	K17497	PMM; phosphomannomutase [EC:5.4.2.8]
geneYangtao2020113	103.596	AcMDH2	Malate dehydrogenase Like_2	Isocitrate cleavage	gi|470103764|ref|XP_004288300.1|	1255	4e-169	PREDICTED: malate dehydrogenase, glyoxysomal [Fragaria vesca subsp. vesca]	gi|1000941616|ref|XM_002531952.2|	196	1e-96	PREDICTED: Ricinus communis malate dehydrogenase, glyoxysomal (LOC8275944), mRNA	P19446	466	7e-162	Malate dehydrogenase, glyoxysomal	SPCC306.08c	201	1.06e-60	COG0039	pfam00056	Ldh_1_N	lactate/malate dehydrogenase, NAD binding domain. L-lactate dehydrogenases are metabolic enzymes which catalyse the conversion of L-lactate to pyruvate, the last step in anaerobic glycolysis. L-2-hydroxyisocaproate dehydrogenases are also members of the family. Malate dehydrogenases catalyse the interconversion of malate to oxaloacetate. The enzyme participates in the citric acid cycle. L-lactate…	GO:0006097|glyoxylate cycle;GO:0006108|malate metabolic process;GO:0006099|tricarboxylic acid cycle;	GO:0009514|glyoxysome;	GO:0030060|L-malate dehydrogenase activity;	.	.
geneYangtao2019715	30.3565	AcPGP2	phosphoglycolate phosphatase	glycolate oxidation	gi|590633282|ref|XP_007028072.1|	1509	0	2-phosphoglycolate phosphatase 1 [Theobroma cacao]	gi|349705556|emb|FQ384112.1|	565	0	Vitis vinifera clone SS0AAG39YL07	P0DKC4	546	0	Phosphoglycolate phosphatase 1B, chloroplastic	SPBC15D4.15	176	4.36e-52	COG0647	pfam13344	Hydrolase_6	Haloacid dehalogenase-like hydrolase. This family is part of the HAD superfamily.	GO:0016311|dephosphorylation;GO:0009853|photorespiration;	GO:0009507|chloroplast;GO:0005829|cytosol;	GO:0016791|phosphatase activity;GO:0008967|phosphoglycolate phosphatase activity;	K19269	PGP, PGLP; phosphoglycolate phosphatase [EC:3.1.3.18 3.1.3.48]
geneYangtao2012858	1336.98	AcOXO18	oxalate oxidase（Germin_like_18）	oxalate oxidation	gi|629111737|gb|KCW76697.1|	681	1e-86	hypothetical protein EUGRSUZ_D01057 [Eucalyptus grandis]	.	.	.	.	Q9FIC8	236	4e-76	Germin-like protein subfamily 1 member 16	.	.	.	.	pfam00190	Cupin_1	Cupin. This family represents the conserved barrel domain of the 'cupin' superfamily ('cupa' is the Latin term for a small barrel). This family contains 11S and 7S plant seed storage proteins, and germins. Plant seed storage proteins provide the major nitrogen source for the developing plant.	GO:0033609|oxalate metabolic process;	GO:0048046|apoplast;GO:0005618|cell wall;	GO:0030145|manganese ion binding;GO:0045735|nutrient reservoir activity;GO:0046564|oxalate decarboxylase activity;	.	.
geneYangtao2006685	246.1	AcPMI1	phosphomannose isomerase Like_1	L-ascorbate oxidation	gi|802634414|ref|XP_012077987.1|	1732	0	PREDICTED: mannose-6-phosphate isomerase 1 [Jatropha curcas]	gi|743875964|ref|XM_011036769.1|	436	0	PREDICTED: Populus euphratica mannose-6-phosphate isomerase 1-like (LOC105133000), mRNA	Q9FZH5	578	0	Mannose-6-phosphate isomerase 2	SPBC2G2.16	293	2.71e-93	COG1482	pfam01238	PMI_typeI	Phosphomannose isomerase type I. This is a family of Phosphomannose isomerase type I enzymes (EC 5.3.1.8).	GO:0005975|carbohydrate metabolic process;GO:0009298|GDP-mannose biosynthetic process;GO:0019853|L-ascorbic acid biosynthetic process;GO:0009646|response to absence of light;GO:0046686|response to cadmium ion;GO:0046680|response to DDT;GO:0033591|response to L-ascorbic acid;GO:0009744|response to sucrose;GO:0010043|response to zinc ion;	.	GO:0004476|mannose-6-phosphate isomerase activity;GO:0008270|zinc ion binding;	K01809	manA, MPI; mannose-6-phosphate isomerase [EC:5.3.1.8]
geneYangtao2018948	675.36	AcGME2	GDP_mannose_3,5_epimerase Like_2	L-ascorbate oxidation	gi|703121302|ref|XP_010102294.1|	1822	0	GDP-mannose 3,5-epimerase 1 [Morus notabilis]	gi|731389432|ref|XM_003631951.2|	666	0	PREDICTED: Vitis vinifera GDP-mannose 3,5-epimerase 2 (LOC100245900), transcript variant X3, mRNA	A3C4S4	682	0	GDP-mannose 3,5-epimerase 1	PH0378	112	4.87e-27	COG0451	pfam01370	Epimerase	NAD dependent epimerase/dehydratase family. This family of proteins utilize NAD as a cofactor. The proteins in this family use nucleotide-sugar substrates for a variety of chemical reactions.	GO:0019853|L-ascorbic acid biosynthetic process;	GO:0005829|cytosol;	GO:0047918|GDP-mannose 3,5-epimerase activity;GO:0051287|NAD binding;	K10046	GME; GDP-D-mannose 3', 5'-epimerase [EC:5.1.3.18 5.1.3.-]
geneYangtao2002480	2.76035	AcOXO2	oxalate oxidase（Germin_like_2）	oxalate oxidation	gi|567875269|ref|XP_006430224.1|	942	1e-126	hypothetical protein CICLE_v10012698mg [Citrus clementina]	gi|590632006|ref|XM_007027659.1|	250	6e-127	Theobroma cacao RmlC-like cupins superfamily protein (TCM_022573) mRNA, complete cds	Q9SR72	300	2e-101	Germin-like protein subfamily 3 member 2	.	.	.	.	pfam00190	Cupin_1	Cupin. This family represents the conserved barrel domain of the 'cupin' superfamily ('cupa' is the Latin term for a small barrel). This family contains 11S and 7S plant seed storage proteins, and germins. Plant seed storage proteins provide the major nitrogen source for the developing plant.	GO:0033609|oxalate metabolic process;	GO:0048046|apoplast;GO:0005618|cell wall;	GO:0030145|manganese ion binding;GO:0045735|nutrient reservoir activity;GO:0046564|oxalate decarboxylase activity;	.	.
geneYangtao2012856	199.603	AcOXO16	oxalate oxidase（Germin_like_16）	oxalate oxidation	gi|731422598|ref|XP_002276315.2|	670	4e-85	PREDICTED: putative germin-like protein 2-1 [Vitis vinifera]	.	.	.	.	Q9FIC8	237	1e-76	Germin-like protein subfamily 1 member 16	.	.	.	.	pfam00190	Cupin_1	Cupin. This family represents the conserved barrel domain of the 'cupin' superfamily ('cupa' is the Latin term for a small barrel). This family contains 11S and 7S plant seed storage proteins, and germins. Plant seed storage proteins provide the major nitrogen source for the developing plant.	GO:0033609|oxalate metabolic process;	GO:0048046|apoplast;GO:0005618|cell wall;	GO:0030145|manganese ion binding;GO:0045735|nutrient reservoir activity;GO:0046564|oxalate decarboxylase activity;	.	.
geneYangtao2007144	1248.1	AcFDH	formate dehydrogenase	oxalate decarboxylation	gi|590645822|ref|XP_007031449.1|	1824	0	Formate dehydrogenase [Theobroma cacao]	gi|349718994|emb|FQ392519.1|	593	0	Vitis vinifera clone SS0AFA5YF08	Q07511	689	0	Formate dehydrogenase, mitochondrial	SMa0478	354	1.07e-119	COG1052	pfam02826	2-Hacid_dh_C	D-isomer specific 2-hydroxyacid dehydrogenase, NAD binding domain. This domain is inserted into the catalytic domain, the large dehydrogenase and D-lactate dehydrogenase families in SCOP. N-terminal portion of which is represented by family pfam00389.	GO:0042183|formate catabolic process;	GO:0005739|mitochondrion;	GO:0008863|formate dehydrogenase (NAD+) activity;GO:0051287|NAD binding;GO:0016616|oxidoreductase activity, acting on the CH-OH group of donors, NAD or NADP as acceptor;	K00122	FDH; formate dehydrogenase [EC:1.2.1.2]
geneYangtao2008037	321.273	AcGalDH	L_galactose dehydrogenase	L-ascorbate oxidation	gi|590682881|ref|XP_007041459.1|	1495	0	NAD(P)-linked oxidoreductase superfamily protein [Theobroma cacao]	gi|985460645|ref|XM_006486735.2|	451	0	PREDICTED: Citrus sinensis L-galactose dehydrogenase (LOC102621043), mRNA	O81884	541	0	L-galactose dehydrogenase	YMR041c	137	6.25e-37	COG0667	pfam00248	Aldo_ket_red	Aldo/keto reductase family. This family includes a number of K+ ion channel beta chain regulatory domains - these are reported to have oxidoreductase activity.	GO:0006012|galactose metabolic process;GO:0019853|L-ascorbic acid biosynthetic process;	GO:0005829|cytosol;	GO:0010349|L-galactose dehydrogenase activity;	K17744	GalDH; L-galactose dehydrogenase [EC:1.1.1.316]
geneYangtao2004719	882.103	AcGME1	GDP_mannose_3,5_epimerase Like_1	L-ascorbate oxidation	gi|703121302|ref|XP_010102294.1|	2011	0	GDP-mannose 3,5-epimerase 1 [Morus notabilis]	gi|590642650|ref|XM_007030514.1|	769	0	Theobroma cacao GDP-mannose 3,5-epimerase 1 (TCM_026351) mRNA, complete cds	A3C4S4	747	0	GDP-mannose 3,5-epimerase 1	PH0378	123	1.84e-31	COG0451	pfam01370	Epimerase	NAD dependent epimerase/dehydratase family. This family of proteins utilize NAD as a cofactor. The proteins in this family use nucleotide-sugar substrates for a variety of chemical reactions.	GO:0019853|L-ascorbic acid biosynthetic process;	GO:0005829|cytosol;	GO:0047918|GDP-mannose 3,5-epimerase activity;GO:0051287|NAD binding;	K10046	GME; GDP-D-mannose 3', 5'-epimerase [EC:5.1.3.18 5.1.3.-]
geneYangtao2012852	6.24686	AcOXO12	oxalate oxidase（Germin_like_12）	oxalate oxidation	gi|225454930|ref|XP_002277055.1|	640	1e-80	PREDICTED: putative germin-like protein 2-1 [Vitis vinifera]	.	.	.	.	Q9FIC8	231	3e-74	Germin-like protein subfamily 1 member 16	.	.	.	.	pfam00190	Cupin_1	Cupin. This family represents the conserved barrel domain of the 'cupin' superfamily ('cupa' is the Latin term for a small barrel). This family contains 11S and 7S plant seed storage proteins, and germins. Plant seed storage proteins provide the major nitrogen source for the developing plant.	GO:0033609|oxalate metabolic process;	GO:0048046|apoplast;GO:0005618|cell wall;	GO:0030145|manganese ion binding;GO:0045735|nutrient reservoir activity;GO:0046564|oxalate decarboxylase activity;	.	.
geneYangtao2003201	87.7144	AcGLDH	L_galactono_1,4_lactone dehydrogenase	L-ascorbate oxidation	gi|802725164|ref|XP_012085977.1|	2203	0	PREDICTED: L-galactono-1,4-lactone dehydrogenase, mitochondrial isoform X1 [Jatropha curcas]	gi|802725166|ref|XM_012230588.1|	392	0	PREDICTED: Jatropha curcas L-galactono-1,4-lactone dehydrogenase, mitochondrial (LOC105645077), transcript variant X2, mRNA	Q9SU56	808	0	L-galactono-1,4-lactone dehydrogenase, mitochondrial	PA5327	80.1	3.94e-15	COG0277	pfam01565	FAD_binding_4	FAD binding domain. This family consists of various enzymes that use FAD as a co-factor, most of the enzymes are similar to oxygen oxidoreductase. One of the enzymes Vanillyl-alcohol oxidase (VAO) has a solved structure, the alignment includes the FAD binding site, called the PP-loop, between residues 99-110. The FAD molecule is covalently bound in the known structure, however the residue that li…	GO:0019853|L-ascorbic acid biosynthetic process;	GO:0016021|integral component of membrane;GO:0031966|mitochondrial membrane;GO:0005739|mitochondrion;GO:0009536|plastid;	GO:0003885|D-arabinono-1,4-lactone oxidase activity;GO:0050660|flavin adenine dinucleotide binding;GO:0016633|galactonolactone dehydrogenase activity;GO:0080049|L-gulono-1,4-lactone dehydrogenase activity;	K00225	GLDH; L-galactono-1,4-lactone dehydrogenase [EC:1.3.2.3]
geneYangtao2002619	5.82289	AcVTC1-I	Mannose_1_phosphate guanyltransferase（VTC1/GMP）Like_1	L-ascorbate oxidation	gi|823254092|ref|XP_012459688.1|	1461	0	PREDICTED: mannose-1-phosphate guanylyltransferase 1-like [Gossypium raimondii]	gi|567873166|ref|XM_006429110.1|	495	0	Citrus clementina hypothetical protein (CICLE_v10012040mg) mRNA, complete cds	O22287	546	0	Mannose-1-phosphate guanylyltransferase 1	SPCC1906.01	391	9.07e-136	COG1208	pfam00483	NTP_transferase	Nucleotidyl transferase. This family includes a wide range of enzymes which transfer nucleotides onto phosphosugars.	GO:0030244|cellulose biosynthetic process;GO:0042742|defense response to bacterium;GO:0009298|GDP-mannose biosynthetic process;GO:0019853|L-ascorbic acid biosynthetic process;GO:0060359|response to ammonium ion;GO:0009408|response to heat;GO:0009753|response to jasmonic acid;GO:0010193|response to ozone;GO:0009651|response to salt stress;	GO:0005829|cytosol;GO:0005634|nucleus;	GO:0005525|GTP binding;GO:0004475|mannose-1-phosphate guanylyltransferase activity;	K00966	GMPP; mannose-1-phosphate guanylyltransferase [EC:2.7.7.13]
geneYangtao2019948	79.6744	AcGLO3	glycolate/glyoxylate oxidase Like_3	glycolate oxidation	gi|590622434|ref|XP_007025049.1|	1751	0	Aldolase-type TIM barrel family protein isoform 1 [Theobroma cacao]	gi|590622439|ref|XM_007024989.1|	621	0	Theobroma cacao Aldolase-type TIM barrel family protein isoform 1 (TCM_029459) mRNA, complete cds	Q9LRR9	649	0	Peroxisomal (S)-2-hydroxy-acid oxidase GLO1	all0170	333	3.21e-112	COG1304	pfam01070	FMN_dh	FMN-dependent dehydrogenase.	GO:0042742|defense response to bacterium;GO:0050665|hydrogen peroxide biosynthetic process;GO:0009854|oxidative photosynthetic carbon pathway;GO:0009735|response to cytokinin;	GO:0048046|apoplast;GO:0009507|chloroplast;GO:0009570|chloroplast stroma;GO:0022626|cytosolic ribosome;GO:0016020|membrane;GO:0005634|nucleus;GO:0005777|peroxisome;GO:0009506|plasmodesma;	GO:0010181|FMN binding;GO:0008891|glycolate oxidase activity;GO:0052853|long-chain-(S)-2-hydroxy-long-chain-acid oxidase activity;GO:0052854|medium-chain-(S)-2-hydroxy-acid oxidase activity;GO:0052852|very-long-chain-(S)-2-hydroxy-acid oxidase activity;	K11517	HAO; (S)-2-hydroxy-acid oxidase [EC:1.1.3.15]
geneYangtao2014594	0.704822	AcPMI2	phosphomannose isomerase Like_2	L-ascorbate oxidation	gi|641858240|gb|KDO76962.1|	1421	0	hypothetical protein CISIN_1g014147mg [Citrus sinensis]	gi|743820821|ref|XM_011022952.1|	143	4e-67	PREDICTED: Populus euphratica mannose-6-phosphate isomerase 1-like (LOC105123380), mRNA	Q9FZH5	455	2e-155	Mannose-6-phosphate isomerase 2	YER003c	268	8.42e-85	COG1482	pfam01238	PMI_typeI	Phosphomannose isomerase type I. This is a family of Phosphomannose isomerase type I enzymes (EC 5.3.1.8).	GO:0005975|carbohydrate metabolic process;GO:0009298|GDP-mannose biosynthetic process;GO:0019853|L-ascorbic acid biosynthetic process;GO:0009646|response to absence of light;GO:0046686|response to cadmium ion;GO:0046680|response to DDT;GO:0033591|response to L-ascorbic acid;GO:0009744|response to sucrose;GO:0010043|response to zinc ion;	.	GO:0004476|mannose-6-phosphate isomerase activity;GO:0008270|zinc ion binding;	K01809	manA, MPI; mannose-6-phosphate isomerase [EC:5.3.1.8]
geneYangtao2012845	0.397186	AcOXO9	oxalate oxidase（Germin_like_9）	oxalate oxidation	gi|590641238|ref|XP_007030176.1|	814	7e-106	Germin-like protein subfamily 1 member 18 [Theobroma cacao]	gi|590641560|ref|XM_007030203.1|	170	2e-82	Theobroma cacao Germin-like protein 2 (TCM_026065) mRNA, complete cds	P92997	292	3e-98	Germin-like protein subfamily 1 member 13	.	.	.	.	pfam00190	Cupin_1	Cupin. This family represents the conserved barrel domain of the 'cupin' superfamily ('cupa' is the Latin term for a small barrel). This family contains 11S and 7S plant seed storage proteins, and germins. Plant seed storage proteins provide the major nitrogen source for the developing plant.	GO:0033609|oxalate metabolic process;	GO:0048046|apoplast;GO:0005618|cell wall;	GO:0030145|manganese ion binding;GO:0045735|nutrient reservoir activity;GO:0046564|oxalate decarboxylase activity;	.	.
geneYangtao2012031	1.5952	AcOXO7	oxalate oxidase（Germin_like_7）	oxalate oxidation	gi|225455388|ref|XP_002272899.1|	686	1e-87	PREDICTED: germin-like protein 11-1 [Vitis vinifera]	.	.	.	.	Q9FLT3	217	4e-69	Germin-like protein subfamily 3 member 4	.	.	.	.	pfam00190	Cupin_1	Cupin. This family represents the conserved barrel domain of the 'cupin' superfamily ('cupa' is the Latin term for a small barrel). This family contains 11S and 7S plant seed storage proteins, and germins. Plant seed storage proteins provide the major nitrogen source for the developing plant.	GO:0033609|oxalate metabolic process;	GO:0048046|apoplast;GO:0005618|cell wall;	GO:0030145|manganese ion binding;GO:0045735|nutrient reservoir activity;GO:0046564|oxalate decarboxylase activity;	.	.
geneYangtao2000036	0.20774	AcOXO1	oxalate oxidase（Germin_like_1）	oxalate oxidation	gi|645268746|ref|XP_008239677.1|	824	2e-108	PREDICTED: germin-like protein subfamily T member 2 [Prunus mume]	gi|823244215|ref|XM_012599311.1|	135	5e-63	PREDICTED: Gossypium raimondii germin-like protein subfamily T member 2 (LOC105776582), mRNA	Q9LMC9	244	1e-79	Germin-like protein subfamily T member 2	.	.	.	.	pfam00190	Cupin_1	Cupin. This family represents the conserved barrel domain of the 'cupin' superfamily ('cupa' is the Latin term for a small barrel). This family contains 11S and 7S plant seed storage proteins, and germins. Plant seed storage proteins provide the major nitrogen source for the developing plant.	GO:0033609|oxalate metabolic process;	GO:0048046|apoplast;GO:0005618|cell wall;	GO:0030145|manganese ion binding;GO:0045735|nutrient reservoir activity;GO:0046564|oxalate decarboxylase activity;	.	.
geneYangtao2013289	2.35267	AcOXO20	oxalate oxidase（Germin_like_20）	oxalate oxidation	gi|743924962|ref|XP_011006614.1|	642	2e-81	PREDICTED: germin-like protein subfamily 1 member 1 [Populus euphratica]	.	.	.	.	P92998	219	6e-70	Germin-like protein subfamily 1 member 1	.	.	.	.	pfam00190	Cupin_1	Cupin. This family represents the conserved barrel domain of the 'cupin' superfamily ('cupa' is the Latin term for a small barrel). This family contains 11S and 7S plant seed storage proteins, and germins. Plant seed storage proteins provide the major nitrogen source for the developing plant.	GO:0033609|oxalate metabolic process;	GO:0048046|apoplast;GO:0005618|cell wall;	GO:0030145|manganese ion binding;GO:0045735|nutrient reservoir activity;GO:0046564|oxalate decarboxylase activity;	.	.
geneYangtao2000926	0.179974	AcACO1	Aconitase Like_1	Isocitrate cleavage	gi|567920742|ref|XP_006452377.1|	4173	0	hypothetical protein CICLE_v10007338mg [Citrus clementina]	gi|985443878|ref|XM_006475002.2|	951	0	PREDICTED: Citrus sinensis aconitate hydratase, cytoplasmic (LOC102628904), mRNA	P49608	1506	0	Aconitate hydratase, cytoplasmic	BS_citB	878	0	COG1048	pfam00330	Aconitase	Aconitase family (aconitate hydratase).	GO:0006097|glyoxylate cycle;	GO:0005737|cytoplasm;	GO:0051539|4 iron, 4 sulfur cluster binding;GO:0003994|aconitate hydratase activity;GO:0046872|metal ion binding;	.	.
geneYangtao2000357	0.114437	AcMLS	Malate synthase A	Isocitrate cleavage	gi|590669943|ref|XP_007037917.1|	2767	0	Malate synthase, glyoxysomal [Theobroma cacao]	gi|590669942|ref|XM_007037855.1|	878	0	Theobroma cacao Malate synthase, glyoxysomal (TCM_014591) mRNA, complete cds	P17815	1052	0	Malate synthase, glyoxysomal	DRA0277	546	0	COG2225	pfam01274	Malate_synthase	Malate synthase.	GO:0006097|glyoxylate cycle;GO:0006099|tricarboxylic acid cycle;	GO:0009514|glyoxysome;	GO:0004474|malate synthase activity;	K01638	E2.3.3.9, aceB, glcB; malate synthase [EC:2.3.3.9]
geneYangtao2005279	0.00755734	AcICL	isocitrate lyase	Isocitrate cleavage	gi|823261698|ref|XP_012463586.1|	2573	0	PREDICTED: isocitrate lyase [Gossypium raimondii]	gi|566211789|ref|XM_006372885.1|	845	0	Populus trichocarpa Isocitrate lyase family protein (POPTR_0017s06460g) mRNA, complete cds	P17069	994	0	Isocitrate lyase	YER065c	521	4.24e-180	COG2224	pfam00463	ICL	Isocitrate lyase family.	GO:0006097|glyoxylate cycle;GO:0006099|tricarboxylic acid cycle;	GO:0009514|glyoxysome;	GO:0004451|isocitrate lyase activity;GO:0046872|metal ion binding;	.	.
geneYangtao2012847	0	AcOXO10	oxalate oxidase（Germin_like_10）	oxalate oxidation	gi|590641589|ref|XP_007030273.1|	813	7e-107	RmlC-like cupins superfamily protein [Theobroma cacao]	gi|802760615|ref|XM_012234103.1|	149	9e-71	PREDICTED: Jatropha curcas uncharacterized LOC105647879 (LOC105647879), mRNA	Q9FIC9	298	1e-100	Germin-like protein subfamily 1 member 15	.	.	.	.	pfam00190	Cupin_1	Cupin. This family represents the conserved barrel domain of the 'cupin' superfamily ('cupa' is the Latin term for a small barrel). This family contains 11S and 7S plant seed storage proteins, and germins. Plant seed storage proteins provide the major nitrogen source for the developing plant.	GO:0033609|oxalate metabolic process;	GO:0048046|apoplast;GO:0005618|cell wall;	GO:0030145|manganese ion binding;GO:0045735|nutrient reservoir activity;GO:0046564|oxalate decarboxylase activity;	.	.
geneYangtao2012850	0.105495	AcOXO11	oxalate oxidase（Germin_like_11）	oxalate oxidation	gi|823195621|ref|XP_012492679.1|	843	2e-111	PREDICTED: germin-like protein subfamily 1 member 13 [Gossypium raimondii]	gi|595792868|ref|XM_007200121.1|	209	4e-104	Prunus persica hypothetical protein (PRUPE_ppa016284mg) mRNA, complete cds	Q9FIC6	298	1e-100	Germin-like protein subfamily 1 member 17	.	.	.	.	pfam00190	Cupin_1	Cupin. This family represents the conserved barrel domain of the 'cupin' superfamily ('cupa' is the Latin term for a small barrel). This family contains 11S and 7S plant seed storage proteins, and germins. Plant seed storage proteins provide the major nitrogen source for the developing plant.	GO:0033609|oxalate metabolic process;	GO:0048046|apoplast;GO:0005618|cell wall;	GO:0030145|manganese ion binding;GO:0045735|nutrient reservoir activity;GO:0046564|oxalate decarboxylase activity;	.	.
geneYangtao2012854	0.37082	AcOXO14	oxalate oxidase（Germin_like_14）	oxalate oxidation	gi|590641598|ref|XP_007030276.1|	722	5e-93	RmlC-like cupins superfamily protein [Theobroma cacao]	.	.	.	.	Q9FIC8	247	1e-80	Germin-like protein subfamily 1 member 16	.	.	.	.	pfam00190	Cupin_1	Cupin. This family represents the conserved barrel domain of the 'cupin' superfamily ('cupa' is the Latin term for a small barrel). This family contains 11S and 7S plant seed storage proteins, and germins. Plant seed storage proteins provide the major nitrogen source for the developing plant.	GO:0033609|oxalate metabolic process;	GO:0048046|apoplast;GO:0005618|cell wall;	GO:0030145|manganese ion binding;GO:0045735|nutrient reservoir activity;GO:0046564|oxalate decarboxylase activity;	.	.
geneYangtao2012855	0.0570276	AcOXO15	oxalate oxidase（Germin_like_15）	oxalate oxidation	gi|590641598|ref|XP_007030276.1|	601	3e-75	RmlC-like cupins superfamily protein [Theobroma cacao]	.	.	.	.	Q9FIC6	203	5e-64	Germin-like protein subfamily 1 member 17	.	.	.	.	pfam00190	Cupin_1	Cupin. This family represents the conserved barrel domain of the 'cupin' superfamily ('cupa' is the Latin term for a small barrel). This family contains 11S and 7S plant seed storage proteins, and germins. Plant seed storage proteins provide the major nitrogen source for the developing plant.	GO:0033609|oxalate metabolic process;	GO:0048046|apoplast;GO:0005618|cell wall;	GO:0030145|manganese ion binding;GO:0045735|nutrient reservoir activity;GO:0046564|oxalate decarboxylase activity;	.	.
geneYangtao2012857	0.0209434	AcOXO17	oxalate oxidase（Germin_like_17）	oxalate oxidation	gi|590641598|ref|XP_007030276.1|	727	9e-94	RmlC-like cupins superfamily protein [Theobroma cacao]	.	.	.	.	Q9FIC8	247	1e-80	Germin-like protein subfamily 1 member 16	.	.	.	.	pfam00190	Cupin_1	Cupin. This family represents the conserved barrel domain of the 'cupin' superfamily ('cupa' is the Latin term for a small barrel). This family contains 11S and 7S plant seed storage proteins, and germins. Plant seed storage proteins provide the major nitrogen source for the developing plant.	GO:0033609|oxalate metabolic process;	GO:0048046|apoplast;GO:0005618|cell wall;	GO:0030145|manganese ion binding;GO:0045735|nutrient reservoir activity;GO:0046564|oxalate decarboxylase activity;	.	.
geneYangtao2023608	0.0857333	AcOXO22	oxalate oxidase（Germin_like_22）	oxalate oxidation	gi|604300969|gb|EYU20689.1|	363	5e-40	hypothetical protein MIMGU_mgv1a024155mg [Erythranthe guttata]	.	.	.	.	Q9FMA6	129	4e-35	Putative germin-like protein subfamily 1 member 12	.	.	.	.	pfam00190	Cupin_1	Cupin. This family represents the conserved barrel domain of the 'cupin' superfamily ('cupa' is the Latin term for a small barrel). This family contains 11S and 7S plant seed storage proteins, and germins. Plant seed storage proteins provide the major nitrogen source for the developing plant.	GO:0033609|oxalate metabolic process;	GO:0048046|apoplast;GO:0005618|cell wall;	GO:0030145|manganese ion binding;GO:0045735|nutrient reservoir activity;GO:0046564|oxalate decarboxylase activity;	.	.
geneYangtao2003922	0	AcOXO3	oxalate oxidase（Germin_like_3）	oxalate oxidation	gi|763815491|gb|KJB82343.1|	310	7e-33	hypothetical protein B456_013G190900 [Gossypium raimondii]	.	.	.	.	Q9FIC6	111	2e-29	Germin-like protein subfamily 1 member 17	.	.	.	.	pfam00190	Cupin_1	Cupin. This family represents the conserved barrel domain of the 'cupin' superfamily ('cupa' is the Latin term for a small barrel). This family contains 11S and 7S plant seed storage proteins, and germins. Plant seed storage proteins provide the major nitrogen source for the developing plant.	GO:0033609|oxalate metabolic process;	GO:0048046|apoplast;GO:0005618|cell wall;	GO:0030145|manganese ion binding;GO:0045735|nutrient reservoir activity;GO:0046564|oxalate decarboxylase activity;	.	.
geneYangtao2005317	0.0096772	AcOXO5	oxalate oxidase（Germin_like_5）	oxalate oxidation	gi|225447031|ref|XP_002269347.1|	839	3e-110	PREDICTED: putative germin-like protein 2-1 [Vitis vinifera]	gi|568828011|ref|XM_006468276.1|	137	5e-64	PREDICTED: Citrus sinensis putative germin-like protein 2-1 (LOC102616834), transcript variant X2, mRNA	Q6K5Q0	271	2e-89	Putative germin-like protein 2-1	.	.	.	.	pfam00190	Cupin_1	Cupin. This family represents the conserved barrel domain of the 'cupin' superfamily ('cupa' is the Latin term for a small barrel). This family contains 11S and 7S plant seed storage proteins, and germins. Plant seed storage proteins provide the major nitrogen source for the developing plant.	GO:0033609|oxalate metabolic process;	GO:0048046|apoplast;GO:0005618|cell wall;	GO:0030145|manganese ion binding;GO:0045735|nutrient reservoir activity;GO:0046564|oxalate decarboxylase activity;	.	.
geneYangtao2012843	0.0922038	AcOXO8	oxalate oxidase（Germin_like_8）	oxalate oxidation	gi|823195624|ref|XP_012492680.1|	811	1e-106	PREDICTED: germin-like protein subfamily 1 member 14 isoform X1 [Gossypium raimondii]	gi|568850665|ref|XM_006478960.1|	162	5e-78	PREDICTED: Citrus sinensis germin-like protein subfamily 1 member 17 (LOC102620456), mRNA	P92997	294	4e-99	Germin-like protein subfamily 1 member 13	.	.	.	.	pfam00190	Cupin_1	Cupin. This family represents the conserved barrel domain of the 'cupin' superfamily ('cupa' is the Latin term for a small barrel). This family contains 11S and 7S plant seed storage proteins, and germins. Plant seed storage proteins provide the major nitrogen source for the developing plant.	GO:0033609|oxalate metabolic process;	GO:0048046|apoplast;GO:0005618|cell wall;	GO:0030145|manganese ion binding;GO:0045735|nutrient reservoir activity;GO:0046564|oxalate decarboxylase activity;	.	.
